# Supplementary material for: Maternal and Fetal Outcomes of Meconium-Stained Amniotic Fluid at KCMC Teaching Zonal Referral Hospital: A Prospective Cohort Study
Source: Research Square preprint supplement (doi:10.21203/rs.3.rs-8379542/v1), 2026-01-13
Supplement: Supplementary file 1 [file 6a7cbee565c2ce290690f3be.docx]

Table 1: Socio-demographic Characteristics of Participants by Presence of MSAF (N=362)

| **Characteristic** | **Total**  **n(%*)** | **Clear AF**  **n(%)** | **MSAF**  **n(%)** |
| --- | --- | --- | --- |
| **Age group (years)** |  |  |  |
| 18-25 | 115 (31.8) | 78 (67.8) | 37 (32.2) |
| 26-35 | 210 (58.0) | 150 (71.4) | 60 (28.6) |
| >35 | 37 (10.2) | 28 (75.7) | 9 (24.3) |
| **Marital Status** |  |  |  |
| Single | 23 (6.4) | 14 (60.9) | 9 (39.1) |
| Married/Cohabiting | 339 (93.6) | 242 (71.4) | 97 (28.6) |
| **Education Level** |  |  |  |
| Primary | 10 (2.8) | 5 (50.0) | 5 (50.0) |
| Secondary | 63 (17.4) | 47 (74.6) | 16 (25.4) |
| College/University | 289 (79.8) | 204 (70.6) | 85 (29.4) |
| **Occupation** |  |  |  |
| Unemployed | 48 (13.3) | 30 (62.5) | 18 (37.5) |
| Self-employed | 138 (38.1) | 89 (64.5) | 49 (35.5) |
| Employed | 176 (48.6) | 137 (77.8) | 39 (22.2) |
| **Place of Residence** |  |  |  |
| Urban | 330 (91.2) | 239 (72.4) | 91 (27.6) |
| Rural | 32 (8.8) | 17 (53.1) | 15 (46.9) |

*Column percent otherwise is row percent

*MSAF = Meconium-Stained Amniotic Fluid; AF: Amniotic Fluid*

Table 2: Clinical and Obstetric Characteristics of Participants by Presence of MSAF (N=362)

| **Characteristic** | **Total**  **n (%*)** | **Clear AF**  **n (%)** | **MSAF**  **n (%)** |
| --- | --- | --- | --- |
| **Gravidity** |  |  |  |
| Primigravida | 128 (35.4) | 87 (68.0) | 41 (32.0) |
| Multigravida | 78 (21.6) | 51 (65.4) | 27 (34.6) |
| Grand Multigravida | 156 (43.1) | 118 (75.6) | 38 (24.4) |
| **Parity** |  |  |  |
| Primipara | 219 (60.5) | 149 (68.0) | 70 (32.0) |
| Multipara | 133 (36.7) | 101 (75.9) | 32 (24.1) |
| Grand Multipara | 10 (2.8) | 6 (60.0) | 4 (40.0) |
| **Gestational Age at Delivery (weeks)** |  |  |  |
| 37-38 | 166 (45.9) | 107 (64.5) | 59 (35.5) |
| 39-40 | 149 (41.2) | 114 (76.5) | 35 (23.5) |
| >40 | 47 (13.0) | 35 (74.5) | 12 (25.5) |
| **Timing of Membrane Rupture** |  |  |  |
| Before labor | 69 (19.1) | 34 (49.3) | 35 (50.7) |
| During labor | 293 (80.9) | 222 (75.8) | 71 (24.2) |
| **Fetal Heart Rate Anomaly** |  |  |  |
| No anomaly | 309 (85.4) | 234 (75.7) | 75 (24.3) |
| Yes anomaly | 53 (14.6) | 22 (41.5) | 31 (58.5) |
| **Hypertension Disorders** |  |  |  |
| No | 327 (90.3) | 230 (70.3) | 97 (29.7) |
| Yes | 35 (9.7) | 26 (74.3) | 9 (25.7) |
| **Diabetes Mellitus** |  |  |  |
| No | 358 (98.9) | 254 (71.0) | 104 (29.0) |
| Yes | 4 (1.1) | 2 (50.0) | 2 (50.0) |
| **History of PPH** |  |  |  |
| No | 337 (93.1) | 239 (70.9) | 98 (29.1) |
| Yes | 25 (6.9) | 17 (68.0) | 8 (32.0) |

*Column percent unless otherwise specified; PPH: Postpartum Hemorrhage

Table 3: Maternal outcomes frequency and proportions by MSAF status and grades (N=362)

| **Category** | **Total** | **CS Delivery**  **n (%)** | **Puerperal Sepsis**  **n (%)** | **Postpartum Hemorrhage (PPH)** |
| --- | --- | --- | --- | --- |
| **Overall** | 362 | 63 (17.4) | 33 (9.1) | 31 (8.6) |
| **Clear AF** | 256 | 18 (7.0) | 17 (6.6) | 6 (2.3) |
| **MSAF (any grade)** | 106 | 45 (42.5) | 16 (15.1) | 25 (23.6) |
| **MSAF Grade 1** | 15 | 4 (26.7) | 2 (13.3) | 2 (13.3) |
| **MSAF Grade 2** | 50 | 19 (38.0) | 7 (14.0) | 13 (26.0) |
| **MSAF Grade 3** | 41 | 22 (53.7) | 7 (17.1) | 10 (24.4) |

Table 4: Crude and Adjusted Risk Ratios for Adverse Maternal Outcomes by MSAF Status and Grades (N=362)

| **MSAF Grade** | **CS delivery** | | **Puerperal Sepsis** | | **Postpartum Hemorrhage (PPH)** | |
| --- | --- | --- | --- | --- | --- | --- |
| **cRR (95% CI)** | **aRR (95% CI)** | **cRR (95% CI)** | **aRR (95% CI)** | **cRR (95% CI)** | **aRR (95% CI)** |
| **MSAF (any grade)** | 6.0 (3.7-9.9) | 6.3 (3.9-10.1)a * | 2.3 (1.2-4.3) | 2.2(1.2-4.3) b * | 10.1 (4.2-23.9) | 9.8 (4.1-23.2)c* |
| **MSAF Grade 1** | 3.8 (1.5-9.8)* | 3.2 (1.5-6.8) a * | 2.0 (0.5-7.9) | 1.8 (0.4-7.8)b | 5.7 (1.3-25.9)* | 5.7 (1.3-25.7)c* |
| **MSAF Grade 2** | 5.4 (3.1-9.6)* | 5.7 (3.3-9.9) a * | 2.1 (0.9-4.8) | 2.0 (0.9-4.8) b | 11.1 (4.4-27.8)* | 10.2 (4.0-25.7)c* |
| **MSAF Grade 3** | 7.6 (4.5-13.0)* | 9.1 (5.2-16.0) a * | 2.6 (1.1-5.8)* | 2.6 (1.2-5.8) b * | 10.4 (4.0-27.1)* | 11.2 (4.2-30.0)c* |

** Significant predictor of outcome, the reference group was clear amniotic fluid (CAF)*

ᵃ Adjusted for maternal age, parity, hypertensive disorders of pregnancy and any indication for CS was not included to avoid over-adjustment as it may lie on the causal pathway between MSAF and maternal outcomes.

ᵇ Adjusted for maternal age, parity, hypertensive disorders of pregnancy, and Puerperal sepsis.

ᶜ Adjusted for maternal age, parity, mode of delivery, hypertensive disorders of pregnancy, and history of postpartum hemorrhage.

Table 5: Adverse Fetal outcomes frequency and proportions by MSAF status (N=362)

| **Category**  **+** | **Total** | **NICU Admission**  **n (%)** | **Neonatal Infection**  **n (%)** | **Respiratory Distress**  **n (%)** | **Neonatal Asphyxia**  **n (%)** | **Neonatal Death**  **n (%)** |
| --- | --- | --- | --- | --- | --- | --- |
| **Overall** | 362 | 50 (13.8) | 57 (15.7) | 33 (9.1) | 36 (9.9) | 9 (2.5) |
| **Clear AF** | 256 | 20 (7.8) | 26 (10.2) | 20 (7.8) | 19 (7.4) | 3 (1.2) |
| **MSAF Grade 1** | 15 | 3 (20.0) | 3 (20.0) | 1 (6.7) | 2 (13.3) | 1 (6.7) |
| **MSAF Grade 2** | 50 | 12 (24.0) | 14 (28.0) | 6 (12.0) | 8 (16.0) | 2 (4.0) |
| **MSAF Grade 3** | 41 | 15 (36.6) | 14 (34.1) | 6 (14.6) | 7 (17.1) | 3 (7.3) |

Table 6: Crude and Adjusted Risk Ratios for Adverse Fetal Outcomes by MSAF Grades (N=362)

| **MSAF and grade** | **NICU Admission** | | | **Neonatal Infection** | | **Respiratory Distress** | | **Neonatal Death** | | **Neonatal Asphyxia** | |
| --- | --- | --- | --- | --- | --- | --- | --- | --- | --- | --- | --- |
|  | **cRR (95% CI)** | | **aRR (95% CI)** | **cRR (95% CI)** | **aRR (95% CI)** | **cRR (95% CI)** | **aRR (95% CI)** | **cRR (95% CI)** | **aRR (95% CI)** | **cRR (95% CI)** | **aRR (95% CI)** |
| **MSAF** | | 3.6 (2.2-6.1)* | 3.8 (2.3-6.3)*ᵃ | 2.9 (1.8-4.6)* | 1.3 (0.6-2.5)ᵇ | 1.6 (0.8-3.0) | 1.3 (0.6-2.5)ᵇ | 4.8 (1.2-19.0)* | - | 2.5 (1.2-4.0)* | 2.1 (1.1-4.6)*ᶜ |
| **MSAF Grade 1** | | 2.6 (0.9-7.7) | 2.6 (0.8-7.9)ᵃ | 1.9 (0.7-5.8) | 0.9 (0.1-6.5)ᵇ | 0.9 (0.1-5.9) | 0.9 (0.1-6.5)ᵇ | 5.7 (0.6-51.6) | 6.4 (0.7-59.5)ᵃ | 1.8 (0.5-7.0) | 1.6 (0.4-6.4)ᶜ |
| **MSAF Grade 2** | | 3.1 (1.6-5.9)* | 3.3 (1.7-6.4)*ᵃ | 2.8 (1.6-4.9)* | 1.1 (0.5-2.6)ᵇ | 1.5 (0.7-3.6) | 0.9 (0.4-2.2)ᵇ | 3.4 (0.58-19.9) | 1.1 (0.2-6.6)ᵃ | 2.1 (1.0-4.7)* | 2.2 (1.1-4.6)*ᶜ |
| **MSAF Grade 3** | | 4.7 (2.6-8.4)* | 4.7 (2.6-8.3)*ᵃ | 3.4 (1.9-5.9)* | 1.9 (0.7-4.8)ᵇ | 1.9 (0.8-4.4) | 1.8 (0.7-4.7)ᵇ | 6.24 (1.30-29.9)* | 3.8 (1.1-12.7)*ᵃ | 2.3 (1.0-5.1)* | 2.3 (1.0-5.0)*ᶜ |

ᵃ Adjusted for maternal age, parity, mode of delivery, birth weight, and gestational age.
ᵇ Adjusted for maternal age, parity, mode of delivery, and birth weight.
ᶜ Adjusted for maternal age, parity, mode of delivery, gestational age, and birth weight

** Significant predictor of outcome, the reference group was clear amniotic fluid (CAF)*
